# Supplementary material for: Functional Identification of Target by Expression Proteomics (FITExP) reveals protein targets and highlights mechanisms of action of small molecule drugs
Source: PubMed Central journal article supplement (PMC4459150; doi:10.1038/srep11176), 2015-06-08
Supplement: srep11176-s1.pdf [file srep11176-s1.pdf]

Functional Identification of Target by  
Expression Proteomics (FITExP) reveals  
protein targets and highlights mechanisms of  
action of small molecule drugs

*Alexey Chernobrovkin,<sup>1</sup> Consuelo Marin Vicente,<sup>1,2</sup> Neus Visa<sup>2</sup>*

*and Roman A. Zubarev<sup>1</sup>\**

<sup>1</sup>Division of Physiological Chemistry I, Department of Medical Biochemistry and Biophysics, Karolinska Institutet, Scheelesväg 2, SE-17 177 Stockholm, Sweden

<sup>2</sup>Department of Molecular Biology, Stockholm University, Stockholm, Sweden

**SUPPLEMENTARY MATERIALS**

**Supplementary Table (Dataset) 1.** Label-free proteomics quantification data and protein drug target identification results based on Regulation and Specificity for Experiment 1. Cell lines HCT116, A375, and H1299 were treated with 5-FU, TDX, MTX, PCTL and DOXO, as well as DMSO (control), or left in unchanged media for senescence/starvation (SEN).

**Supplementary Table (Dataset) 2.** Label-free proteomics quantification data and protein drug target identification results based on Regulation and Specificity for Experiment 2. Cell lines RKO and A375 treated with DOXO, 5-FU, CAMP and PCTL, as well as DMSO (control), or left in unchanged media for senescence/starvation (SEN).

**Supplementary Table (Dataset) 3.** Drug target identification results based on drug target exceptional behavior for Experiment 1. Cell lines HCT116, A375, H1299 treated with 5-FU, TDX, MTX, PCTL and DOXO, as well as DMSO (control), or left in unchanged media for senescence/starvation (SEN).

# Functional Identification of Target by Expression Proteomics

Alexey Chernobrovkin

January 26, 2015

## Data import and preprocessing

Raw mass-spectrometry data were processed by [Quanti workflow](#). Protein-level quantitative data were put into supplementary table 1. The code here represents data analysis workflow for FITEXP method.

```
require(gdata)
# data can be imported from original supplementary file (but its pretty slow)
#data <- read.xls('Supplementary Table 1.xlsx', 'initial data', head=T)
# or from csv file
data <- read.csv('data.csv', head=T)

rownames(data) <- data$PROTEIN.ID
columns.na <- apply(data[,grep('_',names(data))], 2, function(x){sum(is.na(x))})
bad.columns <- names(columns.na[columns.na>(mean(columns.na)+sd(columns.na))])

data <- data[,!(names(data)%in% bad.columns)]
names(data) <- sub('5.FU','5FU', names(data))
filemask <- '([^_]+)_([^_]+)(\\.\\.\\d+)?'
drugs <- unique(
  sub(
    filemask,
    '\\2',
    grep('_', names(data), value=T)
  )
)
cells <- unique(
  sub(
    filemask,
    '\\1',
    grep('_', names(data), value=T)
  )
)
```

4168 proteins were identified and quantified with at least two unique peptides over all samples. Data on 3 cell lines (Melanoma, Lung, Colon) and 8 conditions (CT0, 5FU, DOXO, MTX, CT72, PCTL, SEN, TDX) was loaded.

To calculate ratio of protein abundances in different treatments *median of the ratios* approach was used. For instance, if A1, A2 and A3 are abundances of protein in condition A, and B1, B2, B3 in condition B, then ratio  $r_{A/B}$  would be defined as *median*(A1/B1, A1/B2, ..., A3/B3).

## Regulation and Specificity

Regulation is defined as relative abundance of a protein upon treatment compared to the selected control. Specificity is a relative abundance of a protein upon treatment compared to other treatments (excluding

controls).

```
# Regulation
control <- '(CT72)'
for(cell in cells){
  for(drug in drugs){
    target <- sprintf("%s_%s(\\.\\.\\d+)?$", cell, drug)
    if(cell == 'Lung'){
      others <- "Lung_CT\\d+(\\.\\.\\d+)?"
    }else{
      others <- sprintf("%s_%s(\\.\\.\\d+)?$", cell, control)
    }
    res <- median.ratio(
      data,
      target,
      others
    )
    if(sum(!is.na(res))>0){
      data[,sprintf("%s_%s.regulation", drug, cell)] <- res
    }
  }
}

# Specificity
for(cell in cells){
  for(drug in drugs){
    target <- sprintf("%s_%s(\\.\\.\\d+)?$", cell, drug)
    other.drugs <- setdiff(drugs, drug)
    other.drugs <- setdiff(other.drugs, control)
    other.drugs <- setdiff(other.drugs, c('CT0'))
    others <- sprintf(
      "%s_(%s)(\\.\\.\\d+)?$",
      cell,
      paste(other.drugs, collapse='|')
    )
    res <- median.ratio(
      data,
      target,
      others
    )
    if(sum(!is.na(res))>0){
      data[,sprintf("%s_%s.specificity", drug, cell)] <- res
    }
  }
}
```

Rank product method realization on regulation and specificity values (produces MOA p-values).

```
require(xtable)
```

```
## Loading required package: xtable
```

```

suffix <- '(specificity|regulation)'
for(drug in setdiff(drugs,c('CT0','CT72','SEN'))){
  tRPMADData<-log2(data[,grepl(paste(drug,suffix,sep='.*'),names(data))])
  if(is.data.frame(tRPMADData)){
    NumElements<-rowSums(is.finite(!is.na(tRPMADData)))
    NumReps <- max(unique(NumElements))
    RPMAownUp_pvalues<-RPMAownDown_pvalues<-NULL
    for (d in unique(NumElements)) {
      RPMADData<-tRPMADData[NumElements==d,]
      if(d>1 && length(as.matrix(RPMADData))>ncol(tRPMADData)) {
        RP.own<-0
        Rank<-NULL
        RankNAs<-0
        for (r in 1:NumReps) {
          Rank[[r]]<-rank(RPMADData[,r],na.last="keep")/(sum(!is.na(RPMADData[,r]))+1)
          names(Rank[[r]]) <-rownames(RPMADData)
          Rank[[r]][is.na(Rank[[r]])]<-1
          RP.own<-RP.own+log(Rank[[r]])
          RankNAs<-RankNAs+sum(Rank[[r]]>1)
        }
        RP.own<-exp(RP.own)
        RPownCorr<- -log(RP.own)
        RPMAownUp_pvalues<-c(RPMAownUp_pvalues,pgamma(RPownCorr,d))

        RP.own<-0
        Rank<-NULL
        RankNAs<-0
        for (r in 1:NumReps) {
          Rank[[r]]<-rank(-RPMADData[,r],na.last="keep")/(sum(!is.na(RPMADData[,r]))+1)
          names(Rank[[r]]) <-rownames(RPMADData)
          Rank[[r]][is.na(Rank[[r]])]<-1
          RP.own<-RP.own+log(Rank[[r]])
          RankNAs<-RankNAs+sum(Rank[[r]]>1)
        }
        RP.own<-exp(RP.own)
        RPownCorr<- -log(RP.own)
        RPMAownDown_pvalues<-c(RPMAownDown_pvalues,pgamma(RPownCorr,d))
      }
    }
  }
  RPMAown_pvalues<-2*apply(cbind(RPMAownDown_pvalues,RPMAownUp_pvalues),1,min)
drug.res <- data.frame(
  row.names=names(RPMAown_pvalues),
  p.value=RPMAown_pvalues,
  updown=ifelse(RPMAownDown_pvalues>RPMAownUp_pvalues, 'Up','Down'))

drug.res <- merge(drug.res, data[,c('PROTEIN.ID','DESCRIPTION','PEPTIDES')], by=0, all=F)
drug.res$p.value[drug.res$p.value>1] <- 1
drug.res$p.adjust <- p.adjust(drug.res$p.value, method='bonferroni')
drug.res.print <- drug.res[order(drug.res$p.value),
  c('PROTEIN.ID',
    'DESCRIPTION',
    'PEPTIDES',
    'updown'),

```

```

        'p.value',
        'p.adjust'])
drug.res.print <- drug.res.print[drug.res.print$p.adjust<0.01,]
print(
  xtable(
    drug.res.print,
    caption=sprintf("Proteins with significant and specific changes in abundance upon treatment with 5FU"),
    display=c('d','s','s','d','s','e','e')),
  scalebox=0.7,
  comment=F,
  timestamp=NULL,
  include.rownames = F,
  type='latex')
#write.csv(drug.res[order(drug.res$p.value),],file=paste('corr2_',drug,'.csv',sep=''))}
}
}

```

| PROTEIN.ID  | DESCRIPTION                                                         | PEPTIDES | updown | p.value  | p.adjust |
|-------------|---------------------------------------------------------------------|----------|--------|----------|----------|
| IPI00410026 | Isoform 2 of Putative RNA-binding protein Luc7-like 1               | 2        | Up     | 1.73e-07 | 7.21e-04 |
| IPI00013890 | Isoform 1 of 14-3-3 protein sigma                                   | 13       | Up     | 4.06e-07 | 1.69e-03 |
| IPI00967757 | Uncharacterized protein                                             | 3        | Down   | 5.37e-07 | 2.24e-03 |
| IPI00221108 | Thymidylate synthase                                                | 5        | Up     | 8.58e-07 | 3.58e-03 |
| IPI00168603 | Choline dehydrogenase, mitochondrial                                | 4        | Down   | 8.85e-07 | 3.69e-03 |
| IPI00795015 | Isoform 1 of Sacsin                                                 | 9        | Down   | 9.27e-07 | 3.86e-03 |
| IPI00032291 | Complement C5                                                       | 3        | Down   | 9.52e-07 | 3.97e-03 |
| IPI00056499 | Zinc finger protein 622                                             | 5        | Down   | 1.09e-06 | 4.53e-03 |
| IPI00977661 | RPL17-C18orf32 protein isoform 1                                    | 8        | Down   | 1.17e-06 | 4.87e-03 |
| IPI00550900 | Translationally-controlled tumor protein                            | 6        | Up     | 1.26e-06 | 5.24e-03 |
| IPI00967907 | Uncharacterized protein                                             | 2        | Down   | 1.40e-06 | 5.83e-03 |
| IPI00419919 | Ribosomal protein L29                                               | 3        | Down   | 1.66e-06 | 6.94e-03 |
| IPI00641788 | U1 small nuclear ribonucleoprotein C                                | 2        | Up     | 1.82e-06 | 7.59e-03 |
| IPI00797038 | Isoform 1 of Phosphoenolpyruvate carboxykinase [GTP], mitochondrial | 18       | Down   | 1.93e-06 | 8.03e-03 |
| IPI00012772 | 60S ribosomal protein L8                                            | 11       | Down   | 2.09e-06 | 8.70e-03 |

Table 1: Proteins with significant and specific changes in abundance upon treatment with 5FU

| PROTEIN.ID  | DESCRIPTION                                       | PEPTIDES | updown | p.value  | p.adjust |
|-------------|---------------------------------------------------|----------|--------|----------|----------|
| IPI00032107 | Sulfate transporter                               | 8        | Up     | 8.50e-09 | 3.54e-05 |
| IPI00026848 | Alpha-2-macroglobulin receptor-associated protein | 14       | Up     | 2.31e-07 | 9.62e-04 |
| IPI00440493 | ATP synthase subunit alpha, mitochondrial         | 2        | Up     | 1.79e-06 | 7.44e-03 |
| IPI00375454 | Isoform 2 of Telomere-associated protein RIF1     | 4        | Up     | 1.84e-06 | 7.68e-03 |

Table 2: Proteins with significant and specific changes in abundance upon treatment with DOXO

| PROTEIN.ID  | DESCRIPTION                                             | PEPTIDES | updown | p.value  | p.adjust |
|-------------|---------------------------------------------------------|----------|--------|----------|----------|
| IPI00030357 | Dihydrofolate reductase                                 | 4        | Up     | 8.01e-17 | 3.34e-13 |
| IPI01009731 | Uncharacterized protein                                 | 3        | Down   | 1.41e-09 | 5.88e-06 |
| IPI00977565 | Uncharacterized protein                                 | 4        | Up     | 3.28e-08 | 1.37e-04 |
| IPI00925572 | asparagine synthetase [glutamine-hydrolyzing] isoform b | 16       | Down   | 6.89e-07 | 2.87e-03 |
| IPI00025340 | Pyridoxal phosphate phosphatase                         | 4        | Up     | 8.56e-07 | 3.57e-03 |
| IPI00221117 | Acylphosphatase-1                                       | 3        | Up     | 2.13e-06 | 8.89e-03 |
| IPI00001022 | Isoform 2 of Probable hydrolase PNKD                    | 2        | Up     | 2.15e-06 | 8.97e-03 |

Table 3: Proteins with significant and specific changes in abundance upon treatment with MTX

## Correlation-based exceptionality assesment

For each I-th protein and each J-th drug treatment, two vectors were calculated:

$$C_i^{I,*} = Corr(Reg_{i,j}^c, Reg_{I,j}^c), C_i^{I,J} = Corr(Reg_{i,j \neq J}^c, Reg_{I,j \neq J}^c),$$

| PROTEIN.ID  | DESCRIPTION                                                                           | PEPTIDES | updown | p.value  | p.adjust |
|-------------|---------------------------------------------------------------------------------------|----------|--------|----------|----------|
| IPI00930715 | cDNA, FLJ93005, highly similar to Homo sapiens tubulin, beta polypeptide (TUBB), mRNA | 2        | Up     | 7.19e-12 | 3.00e-08 |
| IPI00013683 | Tubulin beta-3 chain                                                                  | 6        | Up     | 1.59e-10 | 6.64e-07 |
| IPI01022164 | 48 kDa protein                                                                        | 8        | Up     | 1.33e-09 | 5.54e-06 |
| IPI00645213 | Uncharacterized protein                                                               | 3        | Down   | 2.62e-09 | 1.09e-05 |
| IPI00785110 | Isoform 1 of Nucleosome-remodeling factor subunit BPTF                                | 3        | Down   | 6.42e-09 | 2.67e-05 |
| IPI00289501 | Neurosecretory protein VGF                                                            | 8        | Up     | 7.14e-09 | 2.97e-05 |
| IPI00844515 | Isoform 2 of Hyaluronan mediated motility receptor                                    | 4        | Down   | 4.51e-08 | 1.88e-04 |
| IPI00554560 | Protein C16orf88                                                                      | 2        | Down   | 4.69e-08 | 1.95e-04 |
| IPI00217949 | Ubiquitin-conjugating enzyme E2 S                                                     | 3        | Up     | 4.78e-08 | 1.99e-04 |
| IPI00549666 | GrpE protein homolog 2, mitochondrial                                                 | 5        | Down   | 7.55e-08 | 3.15e-04 |
| IPI00002214 | Importin subunit alpha-2                                                              | 14       | Up     | 8.73e-08 | 3.64e-04 |
| IPI00299404 | Laminin subunit beta-3                                                                | 6        | Up     | 1.62e-07 | 6.74e-04 |
| IPI00942874 | Isoform 2 of G patch domain-containing protein 8                                      | 2        | Down   | 1.82e-07 | 7.57e-04 |
| IPI00218343 | Tubulin alpha-1C chain                                                                | 5        | Up     | 2.27e-07 | 9.46e-04 |
| IPI00007089 | Ribosome biogenesis protein NSA2 homolog                                              | 2        | Down   | 2.88e-07 | 1.20e-03 |
| IPI01011752 | Isoform 2 of DnaJ homolog subfamily B member 12                                       | 2        | Up     | 2.91e-07 | 1.21e-03 |
| IPI00386520 | Isoform 2 of Ubiquitin/ISG15-conjugating enzyme E2 L6                                 | 3        | Up     | 5.59e-07 | 2.33e-03 |
| IPI00645410 | Isoform 2 of Band 4.1-like protein 1                                                  | 3        | Up     | 6.39e-07 | 2.67e-03 |
| IPI00977858 | HOXA5 protein (Fragment)                                                              | 2        | Down   | 1.02e-06 | 4.24e-03 |
| IPI00737502 | diphthamide biosynthesis protein 2 isoform b                                          | 2        | Down   | 2.06e-06 | 8.57e-03 |
| IPI00220175 | Isoform Tau-E of Microtubule-associated protein tau                                   | 3        | Up     | 2.30e-06 | 9.59e-03 |

Table 4: Proteins with significant and specific changes in abundance upon treatment with PCTL

| PROTEIN.ID  | DESCRIPTION                           | PEPTIDES | updown | p.value  | p.adjust |
|-------------|---------------------------------------|----------|--------|----------|----------|
| IPI00221108 | Thymidylate synthase                  | 5        | Up     | 1.31e-12 | 5.44e-09 |
| IPI00217466 | Histone H1.3                          | 5        | Down   | 1.15e-11 | 4.79e-08 |
| IPI00030357 | Dihydrofolate reductase               | 4        | Up     | 4.24e-10 | 1.77e-06 |
| IPI00299214 | Thymidine kinase, cytosolic           | 6        | Up     | 2.99e-08 | 1.25e-04 |
| IPI00925408 | Uncharacterized protein               | 2        | Down   | 6.36e-08 | 2.65e-04 |
| IPI00031681 | Cyclin-dependent kinase 2             | 5        | Up     | 2.77e-07 | 1.15e-03 |
| IPI00745921 | Isoform 1 of RING finger protein 126  | 3        | Down   | 6.77e-07 | 2.82e-03 |
| IPI00743342 | Four and a half LIM domains protein 2 | 7        | Up     | 7.18e-07 | 2.99e-03 |
| IPI00927879 | Uncharacterized protein               | 8        | Down   | 7.56e-07 | 3.15e-03 |
| IPI00793754 | DNA primase                           | 3        | Up     | 1.20e-06 | 4.99e-03 |

Table 5: Proteins with significant and specific changes in abundance upon treatment with TDX

where  $C_i^{I,*}$  are the Pearson's correlation coefficients of expression profiles over all treatments of i-th and I-th proteins, while  $C_i^{I,J}$  are correlation coefficients of the expression profiles of i-th and I-th proteins excluding treatment J. Then, the linear model  $C_i^{I,*} - C_i^{I,J}$  was created and the coefficient of determination of the model was used to calculate the measure of exceptional behavior  $Exc^{I,J}$  of I-th protein under J-th treatment:

$$Exc^{I,J} = 1/R_{I,J}^2.$$

Because of a number of proteins calculations could take a while

```
if(file.exists('rdata_all.csv')){
  rdata <- read.csv('rdata_all.csv', head=T, row.names=1)
}else{
  rdata0 <- data[,grepl('.*regulation', names(data))]
  rdata0 <- rdata0[!grepl('CT0', names(rdata0))]
  ones <- apply(rdata0, 1, function(x){sum(x==1)})
  rdata <- rdata0[ones<5,]
  rdata <- na.exclude(rdata)
  #rdata <- log2(rdata)
  drugs <- setdiff(drugs, 'CT0')
  res <- data.frame(row.names=row.names(rdata))
  corspec <- function(data, drug){
    tt <- apply(data, 1, function(rrow){
      r1 <- rrow[!grepl(drug, names(data))]
      cor1 <- apply(data[,!grepl(drug, names(data))], 1, function(x){cor(r1, x)})
    })
  }
}
```

```

r2 <- rrow
cor2 <- apply(data, 1, function(x){cor(r2,x)})
corlm <- lm(cor1~cor2)
rs <- summary(corlm)$adj.r.squared
slope <- corlm$coefficients[[2]]
intercept <- corlm$coefficients[[1]]
c(rs,slope,intercept)
}
)
data.frame(t(as.data.frame(tt)))
}
require(parallel)
lcorSpec <- function(data, drug,method='p'){
  mdata <- data
  listed <- as.list.data.frame(as.data.frame(t(mdata)))
  mclapply(listed, function(rrow){
    r1 <- rrow[!grepl(drug, names(mdata))]
    cor1 <- apply(mdata[,!grepl(drug, names(mdata))],1, function(x){cor(r1, x,method=method)})
    r2 <- rrow
    cor2 <- apply(mdata, 1, function(x){cor(r2,x,method=method)})
    corlm <- lm(cor1[cor1>0&cor2>0]~cor2[cor1>0&cor2>0])
    rs <- summary(corlm)$adj.r.squared
    slope <- corlm$coefficients[[2]]
    intercept <- corlm$coefficients[[1]]
    c(rs,slope,intercept)
  }, mc.cores=8
  ) -> tt
  data.frame(t(as.data.frame(tt)))
}
for(drug in setdiff(drugs, c('CTO','CT72'))){
  tmp <- data.frame()
  tmp <- lcorSpec(rdata, drug, 'p')
  names(tmp) <- paste(drug, c('adj.r.squared','slope','intercept'), sep='.')
  res <- cbind(res,tmp)
}
data$DESCRIPTION[match(rownames(rdata), data$PROTEIN.ID)] -> res$description
write.csv(cbind(rdata,res), 'rdata_all.csv')
}

```

Selecting variables for rank product analysis

```

suffix <- '(regulation)'
rd2 <- merge(
  data[,grepl(suffix,names(data))],
  1/rdata[,grepl('(square)',names(rdata))],
  by=0
)
rownames(rd2) <- rd2[,1]
rd2 <- rd2[,2:ncol(rd2)]

```

Rank product method

```

for(drug in setdiff(drugs,c('CT0','CT72'))){
  drug.res <- data.frame(row.names=row.names(rd2))
  tRPMADData<-log2(rd2[,grepl(drug,names(rd2))])
  if(is.data.frame(tRPMADData)){
    NumElements<-rowSums(is.finite(!is.na(tRPMADData)))
    NumReps <- max(unique(NumElements))
    RPMAownUp_pvalues<-RPMAownDown_pvalues<-NULL
    for (d in unique(NumElements)) {
      RPMADData<-tRPMADData[NumElements==d,]
      if(d>1 && length(as.matrix(RPMADData))>ncol(tRPMADData)) {
        RP.own<-0
        Rank<-NULL
        RankNAs<-0
        for (r in 1:NumReps) {
          Rank[[r]]<-rank(RPMADData[,r],na.last="keep")/(sum(!is.na(RPMADData[,r]))+1)
          names(Rank[[r]]) <-rownames(RPMADData)
          Rank[[r]][is.na(Rank[[r]])]<-1
          RP.own<-RP.own+log(Rank[[r]])
          RankNAs<-RankNAs+sum(Rank[[r]]>1)
        }
        RP.own<-exp(RP.own)
        RPownCorr<- -log(RP.own)
        RPMAownUp_pvalues<-c(RPMAownUp_pvalues,pgamma(RPownCorr,d))

        RP.own<-0
        Rank<-NULL
        RankNAs<-0
        for (r in 1:NumReps) {
          Rank[[r]]<-rank(-RPMADData[,r],na.last="keep")/(sum(!is.na(RPMADData[,r]))+1)
          names(Rank[[r]]) <-rownames(RPMADData)
          Rank[[r]][is.na(Rank[[r]])]<-1
          RP.own<-RP.own+log(Rank[[r]])
          RankNAs<-RankNAs+sum(Rank[[r]]>1)
        }
        RP.own<-exp(RP.own)
        RPownCorr<- -log(RP.own)
        RPMAownDown_pvalues<-c(RPMAownDown_pvalues,pgamma(RPownCorr,d))
      }
    }
  }
  RPMAown_pvalues<-2*apply(cbind(RPMAownDown_pvalues,RPMAownUp_pvalues),1,min)
  drug.res <- data.frame(
    row.names=names(RPMAown_pvalues),
    p.value=RPMAown_pvalues,
    updown=ifelse(RPMAownDown_pvalues>RPMAownUp_pvalues, 'Up','Down'))

  drug.res <- merge(drug.res, data[,c('PROTEIN.ID','DESCRIPTION','PEPTIDES')], by=0, all=F)
  drug.res$p.value[drug.res$p.value>1] <- 1
  drug.res$p.adjust <- p.adjust(drug.res$p.value, method='bonferroni')
  drug.res.print <- drug.res[order(drug.res$p.value),
    c('PROTEIN.ID',
      'DESCRIPTION',
      'PEPTIDES',
      'updown')]
}

```

```

        'p.value',
        'p.adjust'])
drug.res.print <- drug.res.print[drug.res.print$p.adjust<0.051,]
print(
  xtable(
    drug.res.print,
    caption=sprintf("Drug target candidates for %s ", drug),
    display=c('d', 's', 's', 'd', 's', 'e', 'e')),
  type='latex',
  scalebox=0.7,
  comment=F,
  timestamp=NULL,
  include.rownames = F)
#write.csv(drug.res[order(drug.res$p.value),], file=paste('corr_', drug, '.csv', sep=''))
}
}

```

| PROTEIN.ID  | DESCRIPTION          | PEPTIDES | updown | p.value  | p.adjust |
|-------------|----------------------|----------|--------|----------|----------|
| IPI00221108 | Thymidylate synthase | 5        | Up     | 1.19e-05 | 4.69e-02 |

Table 6: Drug target candidates for 5FU

| PROTEIN.ID  | DESCRIPTION                                     | PEPTIDES | updown | p.value  | p.adjust |
|-------------|-------------------------------------------------|----------|--------|----------|----------|
| IPI00005401 | Polypeptide N-acetylgalactosaminyltransferase 5 | 2        | Up     | 1.77e-06 | 7.01e-03 |

Table 7: Drug target candidates for DOXO

| PROTEIN.ID  | DESCRIPTION             | PEPTIDES | updown | p.value  | p.adjust |
|-------------|-------------------------|----------|--------|----------|----------|
| IPI00030357 | Dihydrofolate reductase | 4        | Up     | 9.71e-12 | 3.84e-08 |
| IPI00977565 | Uncharacterized protein | 4        | Up     | 6.94e-07 | 2.74e-03 |

Table 8: Drug target candidates for MTX

| PROTEIN.ID  | DESCRIPTION                                                                           | PEPTIDES | updown | p.value  | p.adjust |
|-------------|---------------------------------------------------------------------------------------|----------|--------|----------|----------|
| IPI00930715 | cDNA, FLJ93005, highly similar to Homo sapiens tubulin, beta polypeptide (TUBB), mRNA | 2        | Up     | 2.89e-08 | 1.14e-04 |
| IPI00013683 | Tubulin beta-3 chain                                                                  | 6        | Up     | 3.94e-07 | 1.56e-03 |
| IPI01022164 | 48 kDa protein                                                                        | 8        | Up     | 7.22e-07 | 2.86e-03 |
| IPI00218343 | Tubulin alpha-1C chain                                                                | 5        | Up     | 9.64e-06 | 3.81e-02 |
| IPI00217949 | Ubiquitin-conjugating enzyme E2 S                                                     | 3        | Up     | 1.23e-05 | 4.87e-02 |

Table 9: Drug target candidates for PCTL

| PROTEIN.ID  | DESCRIPTION                                                      | PEPTIDES | updown | p.value  | p.adjust |
|-------------|------------------------------------------------------------------|----------|--------|----------|----------|
| IPI00888907 | Isoform 2 of Cyclin-D1-binding protein 1                         | 2        | Up     | 8.55e-08 | 3.38e-04 |
| IPI00645038 | Uncharacterized protein                                          | 6        | Up     | 1.61e-07 | 6.38e-04 |
| IPI00413641 | Aldose reductase                                                 | 16       | Up     | 1.96e-07 | 7.77e-04 |
| IPI01010566 | Zinc finger and BTB domain-containing protein 38                 | 3        | Up     | 1.81e-06 | 7.18e-03 |
| IPI00878498 | 35 kDa protein                                                   | 2        | Up     | 4.17e-06 | 1.65e-02 |
| IPI00871221 | Isoform 2 of Sodium/potassium-transporting ATPase subunit beta-1 | 9        | Up     | 4.73e-06 | 1.87e-02 |
| IPI00916849 | Protein                                                          | 2        | Up     | 6.31e-06 | 2.50e-02 |

Table 10: Drug target candidates for SEN

| PROTEIN.ID  | DESCRIPTION          | PEPTIDES | updown | p.value  | p.adjust |
|-------------|----------------------|----------|--------|----------|----------|
| IPI00221108 | Thymidylate synthase | 5        | Up     | 2.66e-08 | 1.05e-04 |
| IPI00793754 | DNA primase          | 3        | Up     | 7.45e-06 | 2.95e-02 |

Table 11: Drug target candidates for TDX
